# Supplementary material for: Gender Disparities in Vascular Access and One-Year Mortality among Incident Hemodialysis Patients: An Epidemiological Study in Lazio Region, Italy
Source: MDPI journal article supplement (doi:10.3390/jcm10215116), 2021-10-30
Supplement: s1 [file s1]

**Table S1.** Distribution of socio-demographic, clinical, and welfare characteristics according to type of vascular access for hemodialysis initiation (AVF and CVC). Incident hemodialysis patients from RRDTL Lazio Region (Italy) 2008–2018.

| VASCULAR ACCESS                |                                                                      |      |           |      |      |           |      |           |
|--------------------------------|----------------------------------------------------------------------|------|-----------|------|------|-----------|------|-----------|
|                                |                                                                      | AVF  |           |      | CVC  |           |      | p-Value * |
|                                |                                                                      | N    | %col      | %row | N    | %col      | %row |           |
| <b>Total</b>                   |                                                                      | 4422 | 100.0     | 48.7 | 4646 | 100.0     | 51.2 | 9068      |
| <b>Gender</b>                  |                                                                      |      |           |      |      |           |      | <0.001    |
|                                | <b>Males</b>                                                         | 3078 | 69.6      | 52.5 | 2790 | 60.1      | 47.6 | 5868      |
|                                | <b>Females</b>                                                       | 1344 | 30.4      | 42.0 | 1856 | 40.0      | 58.0 | 3200      |
| <b>Age (years) mean ± std</b>  |                                                                      | 4422 | 69.6±14.2 |      | 4646 | 66.8±14.2 |      | 9068      |
| <b>Age class (years)</b>       |                                                                      |      |           |      |      |           |      | <0.001    |
|                                | <b>19–49</b>                                                         | 599  | 13.6      | 54.8 | 495  | 10.7      | 45.3 | 1094      |
|                                | <b>50–64</b>                                                         | 1011 | 22.9      | 52.3 | 923  | 19.9      | 47.7 | 1934      |
|                                | <b>65–74</b>                                                         | 1239 | 28.0      | 51.9 | 1149 | 24.7      | 48.1 | 2388      |
|                                | <b>75–84</b>                                                         | 1300 | 29.4      | 45.8 | 1537 | 33.1      | 54.2 | 2837      |
|                                | <b>85+</b>                                                           | 273  | 6.2       | 33.5 | 542  | 11.7      | 66.5 | 815       |
| <b>Education qualification</b> |                                                                      |      |           |      |      |           |      | <0.001    |
|                                | <b>No qualifications/Elementary School/Middle School</b>             | 2777 | 62.8      | 46.4 | 3203 | 68.9      | 53.6 | 5980      |
|                                | <b>High School/Degree and more</b>                                   | 1645 | 37.2      | 53.3 | 1443 | 31.1      | 46.7 | 3088      |
| <b>Body Mass Index</b>         |                                                                      |      |           |      |      |           |      | <0.001    |
|                                | <b>Underweight (BMI &lt; 18.0)</b>                                   | 184  | 4.2       | 37.5 | 307  | 6.6       | 62.5 | 491       |
|                                | <b>Normal weight (18.0 ≤ BMI &lt; 25.0)</b>                          | 2200 | 49.8      | 47.5 | 2432 | 52.4      | 52.5 | 4632      |
|                                | <b>Overweight (25.0 ≤ BMI &lt; 30.0)</b>                             | 1399 | 31.6      | 52.2 | 1282 | 27.6      | 47.8 | 2681      |
|                                | <b>Obese (BMI ≥ 30.0)</b>                                            | 639  | 14.5      | 50.6 | 625  | 13.5      | 49.5 | 1264      |
| <b>Self-sufficient</b>         |                                                                      |      |           |      |      |           |      | <0.001    |
|                                | <b>Complete</b>                                                      | 2565 | 58.0      | 60.4 | 1679 | 36.1      | 39.6 | 4244      |
|                                | <b>Little self-sufficient</b>                                        | 1235 | 27.9      | 46.9 | 1400 | 30.1      | 53.1 | 2635      |
|                                | <b>Not self-sufficient</b>                                           | 622  | 14.1      | 28.4 | 1567 | 33.7      | 71.6 | 2189      |
| <b>Comorbidities</b>           |                                                                      |      |           |      |      |           |      |           |
|                                | <b>Heart disease</b>                                                 | 1352 | 30.6      | 41.1 | 1941 | 41.8      | 58.9 | 3293      |
|                                | <b>Peripheral vascular diseases</b>                                  | 538  | 12.2      | 40.7 | 785  | 16.9      | 59.3 | 1323      |
|                                | <b>Cerebrovascular disease</b>                                       | 519  | 11.7      | 41.5 | 732  | 15.8      | 58.5 | 1251      |
|                                | <b>Chronic obstructive pulmonary disease</b>                         | 497  | 11.2      | 38.6 | 790  | 17.0      | 61.4 | 1287      |
|                                | <b>Cancer</b>                                                        | 443  | 10.0      | 40.1 | 663  | 14.3      | 60.0 | 1106      |
|                                | <b>Lipid metabolism's alteration</b>                                 | 317  | 7.2       | 51.3 | 301  | 6.5       | 48.7 | 618       |
|                                | <b>Neurological disease</b>                                          | 93   | 2.1       | 32.6 | 192  | 4.1       | 67.4 | 285       |
|                                | <b>Cardiovascular Risk Factors (Hypertension, Obesity, Diabetes)</b> | 3560 | 80.5      | 50.4 | 3501 | 75.4      | 49.6 | 7061      |
| <b>Type of dialysis unit</b>   |                                                                      |      |           |      |      |           |      | <0.001    |
|                                | <b>Public hospital</b>                                               | 1511 | 34.2      | 44.6 | 1875 | 40.4      | 55.4 | 3386      |

|                                 |      |      |      |      |      |      |        |
|---------------------------------|------|------|------|------|------|------|--------|
| <b>Private clinic</b>           | 2911 | 65.8 | 51.2 | 2771 | 59.6 | 48.8 | 5682   |
| <b>Pre-dialysis counselling</b> |      |      |      |      |      |      | <0.001 |
| <b>Yes</b>                      | 3803 | 86.0 | 55.7 | 3031 | 65.2 | 44.4 | 6834   |
| <b>No</b>                       | 618  | 27.7 | 14.0 | 1614 | 72.3 | 34.7 | 2232   |

\* Chi-square test or Fisher's exact for categorical variable and T-test for continuous variables.

**Table S2.** Association between gender (Female vs Male) and type of vascular access (AVF vs. CVC) for hemodialysis initiation adjusted for socio-demographic, clinical, and welfare variables. Univariable and multivariable logistic regression.

| Effect                                                                                     | Univariable Model |           |         |  | Multivariable Model |           |         |  |
|--------------------------------------------------------------------------------------------|-------------------|-----------|---------|--|---------------------|-----------|---------|--|
|                                                                                            | OR                | 95%CI     | p-Value |  | OR                  | 95%CI     | p-value |  |
| <b>Gender</b> Female vs. Male                                                              | 0.66              | 0.60 0.72 | <0.001  |  | 0.64                | 0.58 0.71 | <0.001  |  |
| <b>Age (years) (ref 19–49)</b> 50–64                                                       | 0.91              | 0.78 1.05 | 0.189   |  | 0.95                | 0.81 1.12 | 0.544   |  |
| 65–74                                                                                      | 0.89              | 0.77 1.03 | 0.116   |  | 1.10                | 0.93 1.29 | 0.260   |  |
| 75–84                                                                                      | 0.70              | 0.61 0.80 | <0.001  |  | 1.00                | 0.85 1.18 | 0.984   |  |
| 85+                                                                                        | 0.42              | 0.35 0.50 | <0.001  |  | 0.79                | 0.64 0.98 | 0.035   |  |
| <b>BMI (Kg/m<sup>2</sup>) (ref Normal weight 18.0 ≤ BMI ≤ 25.0)</b> Underweight BMI < 18.0 | 1.13              | 1.00 1.28 | 0.054   |  | 1.08                | 0.94 1.25 | 0.259   |  |
| Overweight 25.0 ≤ BMI ≤ 30.0                                                               | 0.66              | 0.55 0.80 | <0.001  |  | 0.80                | 0.65 0.98 | 0.035   |  |
| Obese BMI ≥ 30                                                                             | 1.21              | 1.10 1.33 | <0.001  |  | 1.14                | 1.03 1.27 | 0.012   |  |
| <b>Self-sufficient (ref Complete)</b> Little self-sufficient                               | 0.26              | 0.23 0.29 | <0.001  |  | 0.34                | 0.30 0.39 | <0.001  |  |
| Not self-sufficient                                                                        | 0.58              | 0.52 0.64 | <0.001  |  | 0.67                | 0.60 0.74 | <0.001  |  |
| <b>Cardiovascular Risk Factors (Hypertension, Obesity, Diabetes)</b> Yes vs. No            | 1.35              | 1.22 1.49 | <0.001  |  | 1.21                | 1.08 1.35 | 0.001   |  |
| <b>Heart disease</b> Yes vs. No                                                            | 0.61              | 0.56 0.67 | <0.001  |  | 0.71                | 0.64 0.78 | <0.001  |  |
| <b>Peripheral vascular diseases</b> Yes vs. No                                             | 0.68              | 0.59 0.78 | <0.001  |  | 0.84                | 0.73 0.98 | 0.025   |  |
| <b>Cancer</b> Yes vs. No                                                                   | 0.67              | 0.59 0.76 | <0.001  |  | 0.69                | 0.60 0.79 | <0.001  |  |
| <b>Chronic obstructive pulmonary disease</b> Yes vs. No                                    | 0.62              | 0.55 0.70 | <0.001  |  | 0.72                | 0.63 0.82 | <0.001  |  |
| <b>Type of dialysis unit</b> Private clinic vs. Public hospital                            | 1.30              | 1.20 1.42 | <0.001  |  | 1.27                | 1.16 1.40 | <0.001  |  |
| <b>Pre-dialysis counselling</b> Yes vs. No                                                 | 3.28              | 2.95 3.64 | <0.001  |  | 3.35                | 3.00 3.74 | <0.001  |  |
